# Supplementary material for: Aromatic Character and Relative Stability of Pyrazoloporphyrin Tautomers and Related Protonated Species: Insights into How Pyrazole Changes the Properties of Carbaporphyrinoid Systems
Source: MDPI journal article supplement (doi:10.3390/molecules28062854), 2023-03-22
Supplement: s1 [file s1]

**Supplementary Material for**  
**Aromatic Character and Relative Stability of Pyrazoloporphyrin Tautomers**  
**and Related Protonated Species: Insights into How Pyrazole Changes the**  
**Properties of Carbaporphyrinoid Systems**

Deyaa I. AbuSalim and Timothy D. Lash\*

Department of Chemistry, Illinois State University, Normal, IL 61790-4160, USA

**Table of Contents**

Page

|        |                                                                                           |
|--------|-------------------------------------------------------------------------------------------|
| S2-S6  | <b>Table S1:</b> AICD plots of pyrazoloporphyrin tautomers and related protonated species |
| S7     | <b>Table S2:</b> Calculated energies for the optimized structures.                        |
| S8-S25 | <b>Table S3:</b> Cartesian coordinates                                                    |

**Table S1:** AICD plots for pyrazoloporphyrin tautomers and related protonated species.

| Molecule    | <i>Iso 0.05</i>                                                                     | <i>Iso 0.07</i>                                                                       |
|-------------|-------------------------------------------------------------------------------------|---------------------------------------------------------------------------------------|
| PzP-22,24-H | 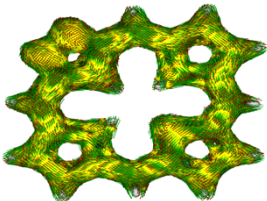   |    |
| PzP-22,23-H |    |    |
| PzP-2,23-H  |   |   |
| PzP-2,22-H  |  |  |
| PzP-2,24-H  |  |  |
| PzP-2,20-H  |  |  |

|            |                                                                                     |                                                                                       |
|------------|-------------------------------------------------------------------------------------|---------------------------------------------------------------------------------------|
| PzP-2,15-H | 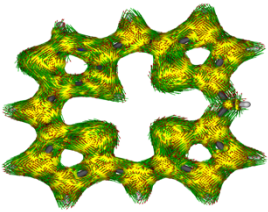   |    |
| PzP-2,10-H |    |    |
| PzP-2,5-H  |    |    |
| PzP-5,22-H |  |  |
| PzP-5,23-H |  |  |
| PzP-5,24-H |  |  |

|                                     |                                                                                     |                                                                                       |
|-------------------------------------|-------------------------------------------------------------------------------------|---------------------------------------------------------------------------------------|
| <b>PzP-10,22-H</b>                  | 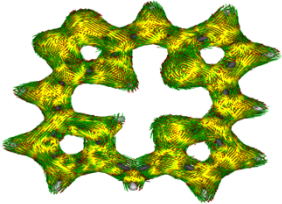   |    |
| <b>PzP-10,23-H</b>                  |    |    |
| <b>PzP-10,24-H</b>                  |    |    |
| <b>PzP-21,22-H</b>                  |  |  |
| <b>PzP-21,23-H</b>                  |  |  |
| <b>[PzP-22,23,24-H]<sup>+</sup></b> |  |  |

|                                     |                                                                                     |                                                                                       |
|-------------------------------------|-------------------------------------------------------------------------------------|---------------------------------------------------------------------------------------|
| <b>[PzP-2,22,24-H]<sup>+</sup></b>  | 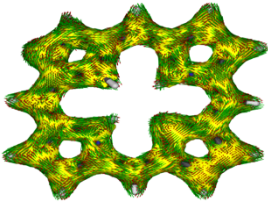   |    |
| <b>[PzP-2,22,23-H]<sup>+</sup></b>  |    |    |
| <b>[PzP-2,23,24-H]<sup>+</sup></b>  |    |    |
| <b>[PzP-21,22,24-H]<sup>+</sup></b> |  |  |
| <b>[PzP-21,22,23-H]<sup>+</sup></b> |  |  |
| <b>[PzP-2,21,22-H]<sup>+</sup></b>  |  |  |



|                                        |                                                                                     |                                                                                       |
|----------------------------------------|-------------------------------------------------------------------------------------|---------------------------------------------------------------------------------------|
| <b>[PzP-2,21,23-H]<sup>+</sup></b>     | 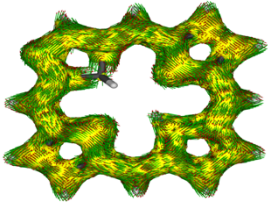   |    |
| <b>[PzP-2,21,24-H]<sup>+</sup></b>     |    |    |
| <b>[PzP-2,22,23,24-H]<sup>2+</sup></b> |    |    |
| <b>[PzP-2,21,22,24-H]<sup>2+</sup></b> |  |  |
| <b>[PzP-2,21,23,24-H]<sup>2+</sup></b> |  |  |
| <b>[PzP-2,21,22,23-H]<sup>2+</sup></b> |  |  |

Table S2: Calculated energies for the optimized structures.

| Molecule                         | <i>E-M06-2X/cc-pVTZ</i><br>(Hartrees) | <i>G298-6-311++G(d,p)</i><br>(Hartrees) | $\Delta E$ (kcal/mol) | $\Delta G$ (kcal/mol) |
|----------------------------------|---------------------------------------|-----------------------------------------|-----------------------|-----------------------|
| PzP-22,24-H                      | -1005.480623                          | -1005.140597                            | 0.00                  | 0.00                  |
| PzP-22,23-H                      | -1005.469997                          | -1005.130723                            | 6.67                  | 6.20                  |
| PzP-2,23-H                       | -1005.480029                          | -1005.140988                            | 0.37                  | -0.25                 |
| PzP-2,22-H                       | -1005.468069                          | -1005.129065                            | 7.88                  | 7.24                  |
| PzP-2,24-H                       | -1005.469343                          | -1005.130369                            | 7.08                  | 6.42                  |
| PzP-2,20-H                       | -1005.429388                          | -1005.095753                            | 32.15                 | 28.14                 |
| PzP-2,15-H                       | -1005.430438                          | -1005.096963                            | 31.49                 | 27.38                 |
| PzP-2,10-H                       | -1005.430159                          | -1005.096685                            | 31.67                 | 27.56                 |
| PzP-2,5-H                        | -1005.428409                          | -1005.095289                            | 32.76                 | 28.43                 |
| PzP-5,22-H                       | -1005.432601                          | -1005.097142                            | 30.13                 | 27.27                 |
| PzP-5,23-H                       | -1005.445125                          | -1005.108831                            | 22.28                 | 19.93                 |
| PzP-5,24-H                       | -1005.439592                          | -1005.103574                            | 25.75                 | 23.23                 |
| PzP-10,22-H                      | -1005.435956                          | -1005.101109                            | 28.03                 | 24.78                 |
| PzP-10,23-H                      | -1005.442049                          | -1005.107036                            | 24.21                 | 21.06                 |
| PzP-10,24-H                      | -1005.439426                          | -1005.104000                            | 25.85                 | 22.96                 |
| PzP-21,22-H                      | -1005.451427                          | -1005.114761                            | 18.32                 | 16.21                 |
| PzP-21,23-H                      | -1005.462669                          | -1005.125990                            | 11.27                 | 9.17                  |
| [PzP-22,23,24-H] <sup>+</sup>    | -1005.856533                          | -1005.500855                            | 16.97                 | 16.70                 |
| [PzP-2,22,24-H] <sup>+</sup>     | -1005.883570                          | -1005.527467                            | 0.00                  | 0.00                  |
| [PzP-2,22,23-H] <sup>+</sup>     | -1005.877750                          | -1005.521954                            | 3.65                  | 3.46                  |
| [PzP-2,23,24-H] <sup>+</sup>     | -1005.876739                          | -1005.520979                            | 4.29                  | 4.07                  |
| [PzP-21,22,24-H] <sup>+</sup>    | -1005.850275                          | -1005.497172                            | 20.89                 | 19.01                 |
| [PzP-21,22,23-H] <sup>+</sup>    | -1005.842394                          | -1005.489318                            | 25.84                 | 23.94                 |
| [PzP-2,21,22-H] <sup>+</sup>     | -1005.841309                          | -1005.489281                            | 26.52                 | 23.96                 |
| [PzP-2,21,23-H] <sup>+</sup>     | -1005.856016                          | -1005.503717                            | 17.29                 | 14.90                 |
| [PzP-2,21,24-H] <sup>+</sup>     | -1005.843930                          | -1005.491283                            | 24.87                 | 22.71                 |
| [PzP-2,22,23,24-H] <sup>2+</sup> | -1006.142287                          | -1005.771668                            | 0.00                  | 0.00                  |
| [PzP-2,21,22,24-H] <sup>2+</sup> | -1006.118183                          | -1005.750606                            | 15.13                 | 13.22                 |
| [PzP-2,21,23,24-H] <sup>2+</sup> | -1006.112757                          | -1005.745321                            | 18.53                 | 16.53                 |
| [PzP-2,21,22,23-H] <sup>2+</sup> | -1006.113341                          | -1005.746100                            | 18.16                 | 16.04                 |

**Table S3. Cartesian Coordinates**

| <b><u>PzP-22,24-H</u></b> |              |              |              |                           |              |              |              |
|---------------------------|--------------|--------------|--------------|---------------------------|--------------|--------------|--------------|
| C                         | -0.672175000 | 4.144190000  | -0.111772000 | H                         | 5.165517000  | 1.312988000  | 0.082147000  |
| C                         | 0.673129000  | 4.144054000  | -0.111715000 | H                         | 5.167813000  | -1.374491000 | 0.107863000  |
| C                         | 1.084762000  | 2.741760000  | -0.059072000 | H                         | 1.179411000  | 0.031303000  | -0.105010000 |
| N                         | 0.000233000  | 1.916249000  | -0.031981000 | H                         | 3.154200000  | 3.189632000  | -0.046609000 |
| C                         | -1.084098000 | 2.742026000  | -0.058849000 | H                         | 3.166643000  | -3.276564000 | -0.104162000 |
| C                         | -4.313332000 | -0.714944000 | 0.077837000  | <b><u>PzP-22,23-H</u></b> |              |              |              |
| C                         | -4.312273000 | 0.653332000  | 0.070102000  | C                         | 0.251710000  | 4.168899000  | -0.160031000 |
| C                         | -2.948224000 | 1.089083000  | 0.029369000  | C                         | 1.587802000  | 3.926842000  | -0.120998000 |
| N                         | -2.178632000 | -0.029276000 | 0.038544000  | C                         | 1.780988000  | 2.506457000  | -0.029393000 |
| C                         | -2.954859000 | -1.166709000 | 0.057921000  | N                         | 0.522300000  | 1.939277000  | -0.022385000 |
| C                         | -2.430871000 | 2.383359000  | -0.027298000 | C                         | -0.448932000 | 2.909755000  | -0.092816000 |
| N                         | 0.633667000  | -4.045264000 | -0.333919000 | C                         | -4.371301000 | 0.209248000  | 0.183572000  |
| N                         | -0.634423000 | -4.045147000 | -0.333999000 | C                         | -4.031141000 | 1.539751000  | 0.164112000  |
| C                         | -1.100963000 | -2.770580000 | 0.073100000  | C                         | -2.617972000 | 1.636079000  | -0.015166000 |
| C                         | -0.000363000 | -1.969329000 | 0.372443000  | N                         | -2.149807000 | 0.357152000  | -0.077644000 |
| C                         | 1.100228000  | -2.770762000 | 0.073468000  | C                         | -3.182171000 | -0.558521000 | 0.035264000  |
| C                         | -2.462752000 | -2.462677000 | 0.025753000  | C                         | -1.831083000 | 2.791710000  | -0.080455000 |
| C                         | 4.312552000  | 0.652287000  | 0.069506000  | N                         | -0.253949000 | -4.104118000 | -0.322602000 |
| C                         | 4.313114000  | -0.715953000 | 0.077787000  | N                         | -1.498060000 | -3.861072000 | -0.321100000 |
| C                         | 2.954426000  | -1.167318000 | 0.058645000  | C                         | -1.705768000 | -2.504264000 | 0.046515000  |
| N                         | 2.178615000  | -0.029604000 | 0.039064000  | C                         | -0.464447000 | -1.926791000 | 0.319163000  |
| C                         | 2.948598000  | 1.088520000  | 0.029216000  | C                         | 0.451912000  | -2.929409000 | 0.049037000  |
| C                         | 2.431527000  | 2.382895000  | -0.027675000 | C                         | -2.978723000 | -1.933313000 | 0.014249000  |
| C                         | 2.462115000  | -2.463165000 | 0.026434000  | C                         | 4.364549000  | -0.312299000 | 0.067729000  |
| H                         | -1.348589000 | 4.985954000  | -0.140549000 | C                         | 4.040259000  | -1.626763000 | 0.049736000  |
| H                         | 1.349706000  | 4.985682000  | -0.140459000 | C                         | 2.586749000  | -1.693015000 | 0.084338000  |
| H                         | -5.168182000 | -1.373269000 | 0.108290000  | N                         | 2.054801000  | -0.433678000 | 0.118317000  |
| H                         | -5.164915000 | 1.314439000  | 0.083569000  | C                         | 3.099041000  | 0.408034000  | 0.093702000  |
| H                         | -1.179648000 | 0.030936000  | -0.107266000 | C                         | 2.969910000  | 1.813063000  | 0.035948000  |
| H                         | -3.153430000 | 3.190217000  | -0.045954000 | C                         | 1.848988000  | -2.870320000 | 0.019600000  |
| H                         | -0.000569000 | -1.029991000 | 0.897921000  | H                         | -0.246653000 | 5.123672000  | -0.230933000 |
| H                         | -3.167424000 | -3.275949000 | -0.104956000 | H                         | 2.391973000  | 4.646046000  | -0.152523000 |
|                           |              |              |              | H                         | 0.457727000  | 0.930755000  | 0.082181000  |



|   |              |              |              |   |              |              |              |
|---|--------------|--------------|--------------|---|--------------|--------------|--------------|
| H | -5.353698000 | -0.213708000 | 0.328325000  | C | 2.419119000  | 2.406080000  | -0.024745000 |
| H | -4.688227000 | 2.387876000  | 0.279307000  | C | -2.463213000 | 2.375698000  | -0.025967000 |
| H | -1.259710000 | 0.090506000  | -0.471890000 | H | 5.209173000  | -1.318142000 | 0.000945000  |
| H | -2.373398000 | 3.728809000  | -0.092389000 | H | 5.151656000  | 1.372511000  | -0.056663000 |
| H | -0.225660000 | -0.980962000 | 0.763207000  | H | -1.080573000 | -4.818269000 | -0.477060000 |
| H | -3.840035000 | -2.586422000 | -0.068907000 | H | 0.017846000  | -0.930019000 | 0.618986000  |
| H | 5.345621000  | 0.139010000  | 0.043728000  | H | 3.259519000  | -3.194976000 | 0.001116000  |
| H | 4.701099000  | -2.480799000 | 0.017490000  | H | -5.176556000 | 1.294212000  | -0.034972000 |
| H | 3.877320000  | 2.405166000  | 0.018313000  | H | -5.183178000 | -1.395534000 | 0.015616000  |
| H | 2.384436000  | -3.803732000 | -0.122647000 | H | -3.202489000 | -3.228228000 | 0.014104000  |

**PzP-2,23-H**

|   |              |              |              |
|---|--------------|--------------|--------------|
| C | 4.349699000  | -0.663580000 | 0.012045000  |
| C | 4.320699000  | 0.683214000  | -0.014434000 |
| C | 2.898341000  | 1.057561000  | 0.011024000  |
| N | 2.112529000  | 0.004133000  | 0.060759000  |
| C | 2.954357000  | -1.105405000 | 0.058754000  |
| N | -0.565984000 | -3.986629000 | -0.229057000 |
| N | 0.753590000  | -4.023714000 | -0.243146000 |
| C | 1.137204000  | -2.773047000 | 0.075300000  |
| C | 0.021519000  | -1.952247000 | 0.312988000  |
| C | -1.078467000 | -2.748018000 | 0.080808000  |
| C | 2.527707000  | -2.396437000 | 0.058847000  |
| C | -4.332372000 | 0.620619000  | -0.003102000 |
| C | -4.335791000 | -0.725177000 | 0.018617000  |
| C | -2.928596000 | -1.138744000 | 0.050772000  |
| N | -2.109519000 | -0.018834000 | 0.045931000  |
| C | -2.914448000 | 1.023701000  | 0.009282000  |
| C | -2.476156000 | -2.422783000 | 0.057180000  |
| C | 0.642227000  | 4.174685000  | -0.052949000 |
| C | -0.704315000 | 4.166735000  | -0.052943000 |
| C | -1.155669000 | 2.781269000  | -0.038932000 |
| N | -0.020332000 | 2.006774000  | -0.031849000 |
| C | 1.110878000  | 2.795326000  | -0.038397000 |

|   |              |              |              |
|---|--------------|--------------|--------------|
| C | 2.419119000  | 2.406080000  | -0.024745000 |
| C | -2.463213000 | 2.375698000  | -0.025967000 |
| H | 5.209173000  | -1.318142000 | 0.000945000  |
| H | 5.151656000  | 1.372511000  | -0.056663000 |
| H | -1.080573000 | -4.818269000 | -0.477060000 |
| H | 0.017846000  | -0.930019000 | 0.618986000  |
| H | 3.259519000  | -3.194976000 | 0.001116000  |
| H | -5.176556000 | 1.294212000  | -0.034972000 |
| H | -5.183178000 | -1.395534000 | 0.015616000  |
| H | -3.202489000 | -3.228228000 | 0.014104000  |
| H | 1.303480000  | 5.028111000  | -0.057201000 |
| H | -1.376012000 | 5.011868000  | -0.057357000 |
| H | -0.015875000 | 0.992890000  | -0.067204000 |
| H | 3.157018000  | 3.199101000  | -0.042350000 |
| H | -3.212342000 | 3.157646000  | -0.041305000 |

**PzP-2,22-H**

|   |              |              |              |
|---|--------------|--------------|--------------|
| C | 3.983896000  | -1.735676000 | -0.043314000 |
| C | 4.354716000  | -0.437687000 | -0.019215000 |
| C | 3.147869000  | 0.374196000  | 0.010064000  |
| N | 2.095973000  | -0.486581000 | -0.003402000 |
| C | 2.530132000  | -1.806897000 | -0.034636000 |
| N | -1.626645000 | -3.699974000 | 0.204682000  |
| N | -0.356314000 | -4.059096000 | 0.223396000  |
| C | 0.328200000  | -2.933583000 | -0.060654000 |
| C | -0.551947000 | -1.858373000 | -0.277432000 |
| C | -1.819295000 | -2.370238000 | -0.071912000 |
| C | 1.768868000  | -2.929908000 | -0.051610000 |
| C | -4.003461000 | 1.739528000  | 0.015946000  |
| C | -4.420899000 | 0.458659000  | 0.000894000  |
| C | -3.202948000 | -0.358835000 | -0.055767000 |
| N | -2.087509000 | 0.459541000  | -0.077719000 |
| C | -2.525347000 | 1.691549000  | -0.028102000 |
| C | -3.099680000 | -1.716854000 | -0.048591000 |

|                          |              |              |              |                          |              |              |              |
|--------------------------|--------------|--------------|--------------|--------------------------|--------------|--------------|--------------|
| C                        | 1.711072000  | 3.912919000  | 0.063993000  | C                        | 4.004938000  | -1.685174000 | -0.050223000 |
| C                        | 0.400741000  | 4.196972000  | 0.053115000  | C                        | 2.549832000  | -1.770596000 | -0.036804000 |
| C                        | -0.311165000 | 2.904153000  | 0.020548000  | N                        | 2.100024000  | -0.462994000 | 0.002259000  |
| N                        | 0.600452000  | 1.868687000  | 0.014786000  | C                        | 3.144846000  | 0.416656000  | 0.014288000  |
| C                        | 1.804590000  | 2.440691000  | 0.039595000  | C                        | 1.795929000  | -2.901496000 | -0.059929000 |
| C                        | 3.038234000  | 1.748668000  | 0.039037000  | C                        | 0.345683000  | 4.202371000  | 0.055065000  |
| C                        | -1.679673000 | 2.849072000  | 0.001576000  | C                        | 1.660748000  | 3.934341000  | 0.067042000  |
| H                        | 4.621814000  | -2.606408000 | -0.073444000 | C                        | 1.771494000  | 2.465395000  | 0.043247000  |
| H                        | 5.354949000  | -0.032264000 | -0.021884000 | N                        | 0.581587000  | 1.877072000  | 0.016881000  |
| H                        | 1.151367000  | -0.118685000 | 0.084892000  | C                        | -0.349052000 | 2.903532000  | 0.020880000  |
| H                        | -2.331283000 | -4.388779000 | 0.422097000  | C                        | -1.712487000 | 2.824539000  | -0.000492000 |
| H                        | -0.370627000 | -0.840621000 | -0.562320000 | C                        | 3.020189000  | 1.782098000  | 0.042856000  |
| H                        | 2.273078000  | -3.888165000 | -0.027142000 | H                        | -5.436202000 | 0.013567000  | 0.045978000  |
| H                        | -4.603934000 | 2.636840000  | 0.063730000  | H                        | -4.633381000 | 2.578477000  | 0.092970000  |
| H                        | -5.433095000 | 0.081980000  | 0.027315000  | H                        | -0.095779000 | -4.907848000 | 0.468074000  |
| H                        | -3.999731000 | -2.320559000 | 0.009041000  | H                        | -0.369475000 | -0.849163000 | -0.599468000 |
| H                        | 2.551975000  | 4.590844000  | 0.086557000  | H                        | -3.976802000 | -2.379549000 | 0.023707000  |
| H                        | -0.080940000 | 5.164228000  | 0.063235000  | H                        | 5.356727000  | 0.031460000  | -0.023129000 |
| H                        | 3.952512000  | 2.327191000  | 0.054183000  | H                        | 4.652986000  | -2.548131000 | -0.086509000 |
| H                        | -2.191183000 | 3.806224000  | 0.020329000  | H                        | 1.148774000  | -0.112530000 | 0.090464000  |
| <b><u>PzP-2,24-H</u></b> |              |              |              | H                        | 2.316494000  | -3.851801000 | -0.051616000 |
| C                        | -4.428656000 | 0.401400000  | 0.008565000  | H                        | -0.147299000 | 5.163898000  | 0.064864000  |
| C                        | -4.024224000 | 1.687978000  | 0.030185000  | H                        | 2.492522000  | 4.623362000  | 0.090616000  |
| C                        | -2.550394000 | 1.654628000  | -0.031966000 | H                        | -2.237755000 | 3.774715000  | 0.020523000  |
| N                        | -2.097543000 | 0.430722000  | -0.099536000 | H                        | 3.927099000  | 2.372455000  | 0.056047000  |
| C                        | -3.207124000 | -0.403419000 | -0.068028000 | <b><u>PzP-2,20-H</u></b> |              |              |              |
| N                        | -0.415684000 | -3.982325000 | 0.226015000  | C                        | -4.374536000 | -0.889040000 | -0.000046000 |
| N                        | -1.713766000 | -3.729494000 | 0.234980000  | C                        | -4.398903000 | 0.462636000  | -0.000039000 |
| C                        | -1.811475000 | -2.425910000 | -0.069406000 | C                        | -2.991124000 | 0.891078000  | -0.000016000 |
| C                        | -0.536823000 | -1.863884000 | -0.295947000 | N                        | -2.172502000 | -0.125414000 | -0.000004000 |
| C                        | 0.360144000  | -2.886445000 | -0.072507000 | C                        | -2.961356000 | -1.262693000 | -0.000025000 |
| C                        | -3.090870000 | -1.758436000 | -0.052453000 | N                        | 0.755598000  | -3.941380000 | 0.000056000  |
| C                        | 4.360598000  | -0.384212000 | -0.020492000 | N                        | -0.566063000 | -4.043109000 | 0.000040000  |

|                          |              |              |              |   |              |              |              |
|--------------------------|--------------|--------------|--------------|---|--------------|--------------|--------------|
| C                        | -0.996496000 | -2.774050000 | 0.000000000  | C | 2.905378000  | 1.098295000  | 0.000005000  |
| C                        | 0.091206000  | -1.858141000 | -0.000016000 | N | 2.179391000  | 0.019254000  | -0.000010000 |
| C                        | 1.211130000  | -2.646878000 | 0.000024000  | C | 3.064173000  | -1.052184000 | 0.000007000  |
| C                        | -2.412225000 | -2.509513000 | -0.000018000 | N | -0.441078000 | -4.001037000 | -0.000024000 |
| C                        | 4.308249000  | 0.969007000  | -0.000071000 | N | 0.878708000  | -4.004609000 | -0.000024000 |
| C                        | 4.419759000  | -0.372480000 | -0.000070000 | C | 1.225837000  | -2.704955000 | -0.000005000 |
| C                        | 3.031535000  | -0.888364000 | 0.000008000  | C | 0.085804000  | -1.870932000 | -0.000001000 |
| N                        | 2.153850000  | 0.056044000  | 0.000055000  | C | -0.986799000 | -2.738585000 | -0.000013000 |
| C                        | 2.865438000  | 1.258703000  | -0.000005000 | C | 2.623733000  | -2.336714000 | 0.000007000  |
| C                        | 2.679302000  | -2.347144000 | 0.000030000  | C | -4.386986000 | 0.467507000  | 0.000016000  |
| C                        | -0.925067000 | 4.167690000  | 0.000065000  | C | -4.365899000 | -0.880355000 | 0.000022000  |
| C                        | 0.418802000  | 4.225228000  | 0.000063000  | C | -2.950293000 | -1.257801000 | -0.000005000 |
| C                        | 0.880330000  | 2.822537000  | 0.000004000  | N | -2.157041000 | -0.102556000 | -0.000009000 |
| N                        | -0.108607000 | 1.968861000  | -0.000032000 | C | -2.969416000 | 0.897505000  | 0.000022000  |
| C                        | -1.269486000 | 2.739705000  | 0.000008000  | C | -2.410391000 | -2.497463000 | -0.000008000 |
| C                        | -2.546176000 | 2.268357000  | 0.000007000  | C | 0.594229000  | 4.206308000  | -0.000030000 |
| C                        | 2.296729000  | 2.484810000  | -0.000024000 | C | -0.747925000 | 4.168224000  | -0.000055000 |
| H                        | -5.209391000 | -1.574506000 | -0.000064000 | C | -1.110946000 | 2.730725000  | 0.000014000  |
| H                        | -5.261023000 | 1.114363000  | -0.000051000 | N | -0.078833000 | 1.951439000  | 0.000015000  |
| H                        | 1.305770000  | -4.786916000 | 0.000082000  | C | 1.042043000  | 2.805565000  | -0.000006000 |
| H                        | 0.041369000  | -0.784249000 | -0.000038000 | C | 2.345416000  | 2.439290000  | -0.000007000 |
| H                        | -3.063356000 | -3.378599000 | -0.000024000 | C | -2.561073000 | 2.337026000  | 0.000032000  |
| H                        | 5.095665000  | 1.708726000  | -0.000120000 | H | 5.332155000  | -1.165926000 | 0.000034000  |
| H                        | 5.320792000  | -0.969593000 | -0.000117000 | H | 5.150176000  | 1.515415000  | 0.000051000  |
| H                        | 3.156268000  | -2.808332000 | -0.874750000 | H | -0.931573000 | -4.882569000 | -0.000038000 |
| H                        | 3.156256000  | -2.808308000 | 0.874829000  | H | 0.050124000  | -0.795195000 | 0.000009000  |
| H                        | -1.635680000 | 4.981514000  | 0.000104000  | H | 3.340413000  | -3.151922000 | 0.000015000  |
| H                        | 1.054693000  | 5.099125000  | 0.000097000  | H | -5.248599000 | 1.120530000  | 0.000024000  |
| H                        | -3.333324000 | 3.017927000  | 0.000033000  | H | -5.202244000 | -1.564182000 | 0.000031000  |
| H                        | 2.973352000  | 3.335129000  | -0.000064000 | H | -3.076080000 | -3.356104000 | -0.000004000 |
| <b><u>PzP-2.15-H</u></b> |              |              |              | H | 1.246163000  | 5.067935000  | -0.000049000 |
| C                        | 4.440861000  | -0.555698000 | 0.000023000  | H | -1.444572000 | 4.995118000  | -0.000089000 |
| C                        | 4.347538000  | 0.791628000  | 0.000033000  | H | 3.069197000  | 3.249851000  | -0.000022000 |
|                          |              |              |              | H | -3.032427000 | 2.822638000  | 0.866047000  |

H -3.032458000 2.822660000 -0.865954000

**PzP-2,10-H**

C 4.370526000 -0.860045000 0.000063000

C 4.381094000 0.488671000 0.000087000

C 2.962479000 0.905807000 0.000014000

N 2.156916000 -0.099916000 -0.000040000

C 2.959928000 -1.251684000 -0.000007000

N -0.733287000 -3.966753000 -0.000042000

N 0.584307000 -4.053650000 -0.000047000

C 1.016404000 -2.780617000 -0.000026000

C -0.063663000 -1.874923000 -0.000006000

C -1.194802000 -2.671020000 -0.000021000

C 2.438540000 -2.498012000 -0.000008000

C -4.351316000 0.772003000 0.000075000

C -4.433747000 -0.575250000 0.000065000

C -3.050758000 -1.057868000 0.000001000

N -2.175681000 0.017643000 -0.000037000

C -2.909424000 1.091305000 0.000012000

C -2.594591000 -2.338296000 0.000002000

C 0.728156000 4.171415000 -0.000065000

C -0.612967000 4.208587000 -0.000055000

C -1.058745000 2.805782000 -0.000001000

N 0.062677000 1.952589000 0.000031000

C 1.094245000 2.732053000 -0.000013000

C 2.544510000 2.343575000 0.000001000

C -2.360939000 2.436179000 -0.000003000

H 5.211766000 -1.537825000 0.000098000

H 5.237336000 1.148860000 0.000144000

H -1.278470000 -4.815468000 -0.000058000

H -0.023007000 -0.799246000 0.000011000

H 3.103068000 -3.356104000 0.000017000

H -5.159867000 1.489112000 0.000121000

H -5.320330000 -1.192394000 0.000104000

H -3.316700000 -3.150231000 0.000030000

H 1.424229000 4.998805000 -0.000104000

H -1.266080000 5.069281000 -0.000088000

H 3.011750000 2.833846000 -0.865774000

H 3.011737000 2.833861000 0.865774000

H -3.089523000 3.242139000 -0.000019000

**PzP-2,5-H**

C 4.418761000 -0.365430000 -0.000260000

C 4.303948000 0.974074000 -0.000287000

C 2.858117000 1.259201000 -0.000063000

N 2.150305000 0.054978000 0.000137000

C 3.030130000 -0.889910000 -0.000003000

N -0.439032000 -3.997504000 0.000184000

N 0.886442000 -3.991780000 0.000253000

C 1.235557000 -2.699236000 0.000104000

C 0.105365000 -1.868171000 -0.000041000

C -0.979364000 -2.739139000 0.000026000

C 2.696567000 -2.348848000 0.000095000

C -4.397002000 0.458428000 -0.000244000

C -4.366731000 -0.892526000 -0.000273000

C -2.950142000 -1.257220000 -0.000063000

N -2.167122000 -0.118945000 0.000091000

C -2.989432000 0.894286000 -0.000034000

C -2.392279000 -2.501345000 -0.000067000

C 0.413700000 4.227884000 0.000258000

C -0.929164000 4.173022000 0.000274000

C -1.275816000 2.743859000 0.000064000

N -0.115828000 1.971220000 -0.000108000

C 0.874385000 2.822283000 0.000010000

C 2.290618000 2.485707000 -0.000108000

C -2.552239000 2.274057000 0.000066000

H 5.320518000 -0.961404000 -0.000401000

H 5.088288000 1.717065000 -0.000467000

|   |              |              |              |   |              |              |              |
|---|--------------|--------------|--------------|---|--------------|--------------|--------------|
| H | -0.925170000 | -4.880652000 | 0.000307000  | C | 2.731726000  | 1.447612000  | 0.059079000  |
| H | 0.064223000  | -0.793345000 | -0.000141000 | C | 2.045173000  | 2.627356000  | 0.010212000  |
| H | 3.178285000  | -2.810122000 | -0.870510000 | C | 2.836383000  | -2.089270000 | -0.021805000 |
| H | 3.178261000  | -2.810010000 | 0.870776000  | H | -2.010087000 | 4.855945000  | -0.149603000 |
| H | -5.262336000 | 1.105799000  | -0.000364000 | H | 0.677768000  | 5.120264000  | -0.092050000 |
| H | -5.199268000 | -1.580908000 | -0.000427000 | H | -4.861293000 | -2.045690000 | 0.354629000  |
| H | -3.054196000 | -3.363686000 | -0.000165000 | H | -5.263778000 | 0.628141000  | 0.243947000  |
| H | 1.051212000  | 5.100612000  | 0.000392000  | H | -1.153129000 | -0.108186000 | -0.247292000 |
| H | -1.638478000 | 4.987952000  | 0.000437000  | H | -3.620764000 | 2.741921000  | -0.055415000 |
| H | 2.966861000  | 3.336062000  | -0.000239000 | H | 0.250118000  | -0.945185000 | 0.76139900   |
| H | -3.341440000 | 3.020998000  | 0.000165000  | H | -2.376982000 | -3.349472000 | -0.921759000 |

**PzP-5,22-H**

|   |              |             |              |   |             |              |              |
|---|--------------|-------------|--------------|---|-------------|--------------|--------------|
| C | -1.257772000 | 4.081357000 | -0.121051000 | H | 5.379889000 | -0.540981000 | 0.126395000  |
| C | 0.092302000  | 4.212254000 | -0.093171000 | H | 2.649492000 | 3.530844000  | 0.024311000  |
| C | 0.629787000  | 2.861151000 | -0.054968000 | H | 3.646627000 | -2.771630000 | -0.259724000 |

|   |              |             |              |
|---|--------------|-------------|--------------|
| N | -0.337257000 | 1.944747000 | -0.065621000 |
|---|--------------|-------------|--------------|

|   |              |             |              |
|---|--------------|-------------|--------------|
| C | -1.510332000 | 2.656623000 | -0.101295000 |
|---|--------------|-------------|--------------|

|   |              |              |             |
|---|--------------|--------------|-------------|
| C | -4.122155000 | -1.273099000 | 0.211845000 |
|---|--------------|--------------|-------------|

|   |              |             |             |
|---|--------------|-------------|-------------|
| C | -4.328436000 | 0.097604000 | 0.150455000 |
|---|--------------|-------------|-------------|

|   |              |             |              |
|---|--------------|-------------|--------------|
| C | -3.073672000 | 0.708376000 | -0.033246000 |
|---|--------------|-------------|--------------|

|   |              |              |              |
|---|--------------|--------------|--------------|
| N | -2.140190000 | -0.309637000 | -0.099259000 |
|---|--------------|--------------|--------------|

|   |              |              |             |
|---|--------------|--------------|-------------|
| C | -2.744932000 | -1.503542000 | 0.047138000 |
|---|--------------|--------------|-------------|

|   |              |             |              |
|---|--------------|-------------|--------------|
| C | -2.765961000 | 2.072412000 | -0.073242000 |
|---|--------------|-------------|--------------|

|   |             |              |              |
|---|-------------|--------------|--------------|
| N | 1.309858000 | -3.937292000 | -0.299662000 |
|---|-------------|--------------|--------------|

|   |             |              |              |
|---|-------------|--------------|--------------|
| N | 0.058976000 | -4.079645000 | -0.354241000 |
|---|-------------|--------------|--------------|

|   |              |              |             |
|---|--------------|--------------|-------------|
| C | -0.590321000 | -2.868312000 | 0.059240000 |
|---|--------------|--------------|-------------|

|   |             |              |             |
|---|-------------|--------------|-------------|
| C | 0.335435000 | -1.949264000 | 0.386856000 |
|---|-------------|--------------|-------------|

|   |             |              |             |
|---|-------------|--------------|-------------|
| C | 1.589819000 | -2.600574000 | 0.098387000 |
|---|-------------|--------------|-------------|

|   |              |              |             |
|---|--------------|--------------|-------------|
| C | -2.076189000 | -2.839946000 | 0.002157000 |
|---|--------------|--------------|-------------|

|   |             |             |             |
|---|-------------|-------------|-------------|
| C | 4.186916000 | 1.299495000 | 0.110215000 |
|---|-------------|-------------|-------------|

|   |             |              |             |
|---|-------------|--------------|-------------|
| C | 4.428124000 | -0.030857000 | 0.101372000 |
|---|-------------|--------------|-------------|

|   |             |              |             |
|---|-------------|--------------|-------------|
| C | 3.110068000 | -0.669248000 | 0.058126000 |
|---|-------------|--------------|-------------|

|   |             |             |             |
|---|-------------|-------------|-------------|
| N | 2.133654000 | 0.208367000 | 0.030818000 |
|---|-------------|-------------|-------------|

**PzP-5,23-H**

|   |             |             |              |
|---|-------------|-------------|--------------|
| C | 0.412720000 | 4.180975000 | -0.000033000 |
|---|-------------|-------------|--------------|

|   |              |             |             |
|---|--------------|-------------|-------------|
| C | -0.972512000 | 4.097886000 | 0.000023000 |
|---|--------------|-------------|-------------|

|   |              |             |              |
|---|--------------|-------------|--------------|
| C | -1.318138000 | 2.734130000 | -0.000067000 |
|---|--------------|-------------|--------------|

|   |              |             |              |
|---|--------------|-------------|--------------|
| N | -0.148726000 | 2.019885000 | -0.000191000 |
|---|--------------|-------------|--------------|

|   |             |             |              |
|---|-------------|-------------|--------------|
| C | 0.916896000 | 2.868279000 | -0.000154000 |
|---|-------------|-------------|--------------|

|   |             |              |             |
|---|-------------|--------------|-------------|
| C | 4.369281000 | -0.389470000 | 0.000088000 |
|---|-------------|--------------|-------------|

|   |             |             |              |
|---|-------------|-------------|--------------|
| C | 4.284913000 | 0.956444000 | -0.000064000 |
|---|-------------|-------------|--------------|

|   |             |             |              |
|---|-------------|-------------|--------------|
| C | 2.857956000 | 1.269073000 | -0.000083000 |
|---|-------------|-------------|--------------|

|   |             |             |             |
|---|-------------|-------------|-------------|
| N | 2.116566000 | 0.083347000 | 0.000035000 |
|---|-------------|-------------|-------------|

|   |             |              |             |
|---|-------------|--------------|-------------|
| C | 2.983840000 | -0.888448000 | 0.000127000 |
|---|-------------|--------------|-------------|

|   |             |             |              |
|---|-------------|-------------|--------------|
| C | 2.305026000 | 2.507630000 | -0.000176000 |
|---|-------------|-------------|--------------|

|   |              |              |              |
|---|--------------|--------------|--------------|
| N | -0.436833000 | -4.180595000 | -0.000505000 |
|---|--------------|--------------|--------------|

|   |             |              |              |
|---|-------------|--------------|--------------|
| N | 0.820799000 | -4.099295000 | -0.000503000 |
|---|-------------|--------------|--------------|

|   |             |              |             |
|---|-------------|--------------|-------------|
| C | 1.222179000 | -2.715471000 | 0.000238000 |
|---|-------------|--------------|-------------|

|   |             |              |             |
|---|-------------|--------------|-------------|
| C | 0.130626000 | -1.939978000 | 0.000765000 |
|---|-------------|--------------|-------------|

|   |              |              |             |
|---|--------------|--------------|-------------|
| C | -0.972924000 | -2.853724000 | 0.000151000 |
|---|--------------|--------------|-------------|





|                           |              |              |              |   |              |              |              |
|---------------------------|--------------|--------------|--------------|---|--------------|--------------|--------------|
| C                         | -4.331497000 | 0.524401000  | -0.079514000 | C | 0.458618000  | -4.145052000 | -0.129966000 |
| C                         | -3.178931000 | -0.272880000 | -0.006037000 | C | 0.960692000  | -2.835369000 | -0.016723000 |
| N                         | -2.107000000 | 0.532094000  | 0.036981000  | N | -0.137436000 | -1.998870000 | 0.119028000  |
| C                         | -2.505198000 | 1.860138000  | -0.001218000 | C | -1.270897000 | -2.726718000 | 0.090708000  |
| C                         | -3.101481000 | -1.762489000 | 0.051398000  | C | -4.254926000 | 1.064360000  | -0.094566000 |
| N                         | 1.720585000  | 3.806862000  | 0.169065000  | C | -4.363193000 | -0.278982000 | 0.005806000  |
| N                         | 0.489328000  | 4.121622000  | 0.172537000  | C | -2.989023000 | -0.781051000 | 0.071456000  |
| C                         | -0.278245000 | 2.955859000  | -0.052429000 | N | -2.101932000 | 0.164613000  | 0.011659000  |
| C                         | 0.597649000  | 1.870544000  | -0.236582000 | C | -2.830156000 | 1.364201000  | -0.097148000 |
| C                         | 1.847499000  | 2.417019000  | -0.063342000 | C | -2.668885000 | -2.227748000 | 0.274856000  |
| C                         | -1.654360000 | 2.976788000  | 0.011549000  | N | 0.931951000  | 4.071895000  | 0.214077000  |
| C                         | 4.034556000  | -1.712749000 | -0.017999000 | N | -0.328175000 | 4.133590000  | 0.174978000  |
| C                         | 4.442750000  | -0.419440000 | -0.015328000 | C | -0.860396000 | 2.845521000  | -0.151142000 |
| C                         | 3.228766000  | 0.384195000  | -0.023471000 | C | 0.159696000  | 1.973288000  | -0.353255000 |
| N                         | 2.121390000  | -0.437522000 | -0.015980000 | C | 1.329404000  | 2.732822000  | -0.067314000 |
| C                         | 2.571743000  | -1.667816000 | -0.014928000 | C | -2.270682000 | 2.601425000  | -0.153048000 |
| C                         | 1.705363000  | -2.820816000 | 0.004555000  | C | 4.297894000  | -0.906176000 | -0.042317000 |
| C                         | 3.104695000  | 1.753629000  | -0.029039000 | C | 4.379125000  | 0.449792000  | 0.015938000  |
| H                         | -2.506897000 | -4.589869000 | 0.050849000  | C | 3.009757000  | 0.929216000  | 0.049832000  |
| H                         | 0.130797000  | -5.146868000 | 0.031622000  | N | 2.135870000  | -0.072998000 | 0.040140000  |
| H                         | -4.526304000 | 2.734502000  | -0.110423000 | C | 2.883215000  | -1.216562000 | -0.020137000 |
| H                         | -5.343726000 | 0.155175000  | -0.128889000 | C | 2.316403000  | -2.475834000 | -0.055635000 |
| H                         | -1.169625000 | 0.143988000  | 0.130596000  | C | 2.611090000  | 2.311121000  | 0.098052000  |
| H                         | -3.624649000 | -2.099276000 | 0.955959000  | H | -1.629768000 | -4.892200000 | -0.126659000 |
| H                         | -3.691464000 | -2.167279000 | -0.779640000 | H | 1.071323000  | -5.025154000 | -0.253616000 |
| H                         | 0.413175000  | 0.842082000  | -0.482855000 | H | -0.097443000 | -0.987078000 | 0.218874000  |
| H                         | -2.131469000 | 3.948223000  | 0.106450000  | H | -5.044240000 | 1.798220000  | -0.168368000 |
| H                         | 4.644390000  | -2.604639000 | -0.011875000 | H | -5.260326000 | -0.879961000 | 0.043467000  |
| H                         | 5.453025000  | -0.037210000 | -0.016410000 | H | -2.979379000 | -2.481288000 | 1.298967000  |
| H                         | 2.216560000  | -3.780183000 | 0.005371000  | H | -3.318569000 | -2.826016000 | -0.371774000 |
| H                         | 3.995649000  | 2.371994000  | 0.027573000  | H | 0.111044000  | 0.949638000  | -0.659275000 |
|                           |              |              |              | H | -2.925609000 | 3.467677000  | -0.153738000 |
|                           |              |              |              | H | 5.103475000  | -1.624378000 | -0.088118000 |
|                           |              |              |              | H | 5.264661000  | 1.068140000  | 0.020189000  |
| <b><u>PzP-10,23-H</u></b> |              |              |              |   |              |              |              |
| C                         | -0.924925000 | -4.077642000 | -0.068934000 |   |              |              |              |

|   |             |              |              |
|---|-------------|--------------|--------------|
| H | 2.997968000 | -3.318164000 | -0.133297000 |
| H | 3.368061000 | 3.059283000  | 0.315406000  |

**PzP-10,24-H**

|   |              |              |              |
|---|--------------|--------------|--------------|
| C | 0.190037000  | 4.193342000  | -0.037130000 |
| C | 1.521005000  | 3.993426000  | -0.028072000 |
| C | 1.707738000  | 2.547169000  | -0.021633000 |
| N | 0.455339000  | 1.901405000  | -0.027717000 |
| C | -0.430371000 | 2.855874000  | -0.035239000 |
| C | -4.440132000 | 0.081119000  | 0.012776000  |
| C | -4.138560000 | 1.397517000  | -0.010565000 |
| C | -2.666408000 | 1.472723000  | -0.000520000 |
| N | -2.114782000 | 0.305517000  | 0.031810000  |
| C | -3.163812000 | -0.626728000 | 0.046280000  |
| C | -1.928416000 | 2.770619000  | -0.043855000 |
| N | -0.164785000 | -4.155753000 | -0.195702000 |
| N | -1.407889000 | -3.919223000 | -0.187996000 |
| C | -1.628469000 | -2.540564000 | 0.092769000  |
| C | -0.431714000 | -1.921956000 | 0.292008000  |
| C | 0.529765000  | -2.944030000 | 0.065546000  |
| C | -2.945188000 | -1.966986000 | 0.067317000  |
| C | 4.357351000  | -0.193279000 | 0.066053000  |
| C | 4.055751000  | -1.551676000 | 0.041838000  |
| C | 2.657039000  | -1.680241000 | -0.015844000 |
| N | 2.138739000  | -0.411679000 | -0.039309000 |
| C | 3.139396000  | 0.503565000  | 0.007992000  |
| C | 2.909912000  | 1.916603000  | -0.004901000 |
| C | 1.888182000  | -2.875468000 | -0.043008000 |
| H | -0.348504000 | 5.130470000  | -0.042692000 |
| H | 2.315455000  | 4.725273000  | -0.024909000 |
| H | -5.415453000 | -0.383281000 | 0.012586000  |
| H | -4.817774000 | 2.237773000  | -0.043513000 |
| H | -2.269259000 | 3.320850000  | -0.932807000 |
| H | -2.283158000 | 3.386851000  | 0.794431000  |

|   |              |              |              |
|---|--------------|--------------|--------------|
| H | -0.317804000 | -0.892171000 | 0.574625000  |
| H | -3.788244000 | -2.649222000 | 0.023869000  |
| H | 5.332987000  | 0.263864000  | 0.118503000  |
| H | 4.746329000  | -2.379958000 | 0.078319000  |
| H | 1.170977000  | -0.119349000 | -0.150124000 |
| H | 3.800705000  | 2.535676000  | 0.007436000  |
| H | 2.428742000  | -3.804820000 | -0.194196000 |

**PzP-21,22-H**

|   |              |              |              |
|---|--------------|--------------|--------------|
| C | -1.535437000 | 3.959626000  | 0.000053000  |
| C | -0.200690000 | 4.169182000  | 0.000024000  |
| C | 0.426041000  | 2.847709000  | 0.000015000  |
| N | -0.496223000 | 1.875000000  | 0.000006000  |
| C | -1.705991000 | 2.514904000  | 0.000032000  |
| C | -4.029908000 | -1.585410000 | -0.000077000 |
| C | -4.356034000 | -0.248454000 | -0.000069000 |
| C | -3.141647000 | 0.487975000  | -0.000004000 |
| N | -2.119252000 | -0.420472000 | 0.000036000  |
| C | -2.611304000 | -1.694024000 | -0.000019000 |
| C | -2.936862000 | 1.872333000  | 0.000028000  |
| N | 1.513152000  | -3.834496000 | 0.000064000  |
| N | 0.248557000  | -4.083879000 | 0.000042000  |
| C | -0.482347000 | -2.911094000 | 0.000010000  |
| C | 0.446901000  | -1.755858000 | -0.000023000 |
| C | 1.748058000  | -2.473047000 | 0.000027000  |
| C | -1.846324000 | -2.885438000 | -0.000002000 |
| C | 4.086366000  | 1.546554000  | -0.000037000 |
| C | 4.429337000  | 0.240699000  | -0.000081000 |
| C | 3.163092000  | -0.504327000 | 0.000001000  |
| N | 2.118402000  | 0.317275000  | -0.000012000 |
| C | 2.617179000  | 1.581124000  | -0.000024000 |
| C | 1.841626000  | 2.719747000  | -0.000010000 |
| C | 2.997116000  | -1.918757000 | 0.000034000  |
| H | -2.334208000 | 4.686720000  | 0.000073000  |

|                           |              |              |              |                                 |              |              |              |
|---------------------------|--------------|--------------|--------------|---------------------------------|--------------|--------------|--------------|
| H                         | 0.331132000  | 5.109678000  | 0.000020000  | N                               | -2.123042000 | 0.051819000  | -0.000009000 |
| H                         | -4.702011000 | -2.429479000 | -0.000122000 | C                               | -2.937312000 | -1.044797000 | 0.000010000  |
| H                         | -5.341895000 | 0.190321000  | -0.000106000 | C                               | -2.466178000 | -2.338671000 | 0.000019000  |
| H                         | -1.156691000 | -0.083383000 | 0.000103000  | C                               | -2.464722000 | 2.460165000  | 0.000002000  |
| H                         | -3.826947000 | 2.491817000  | 0.000032000  | H                               | 1.351385000  | -4.965400000 | -0.000131000 |
| H                         | 0.355212000  | -1.100316000 | 0.872211000  | H                               | -1.349776000 | -4.965787000 | -0.000148000 |
| H                         | 0.355248000  | -1.100392000 | -0.872316000 | H                               | 0.000218000  | -0.961833000 | 0.000289000  |
| H                         | -2.383952000 | -3.826533000 | 0.000015000  | H                               | 5.182617000  | 1.384210000  | -0.000129000 |
| H                         | 4.736310000  | 2.409657000  | -0.000044000 | H                               | 5.188744000  | -1.311945000 | 0.000098000  |
| H                         | 5.418577000  | -0.193259000 | -0.000118000 | H                               | 3.199230000  | -3.138391000 | 0.000012000  |
| H                         | 2.380210000  | 3.663156000  | -0.000022000 | H                               | -0.000264000 | 1.145932000  | 0.868323000  |
| H                         | 3.861534000  | -2.572654000 | 0.000063000  | H                               | -0.000271000 | 1.146103000  | -0.868655000 |
| <b><u>PzP-21,23-H</u></b> |              |              |              | H                               | 3.182178000  | 3.272966000  | 0.000039000  |
| C                         | 0.688187000  | -4.114121000 | -0.000058000 | H                               | -5.188251000 | -1.313631000 | -0.000012000 |
| C                         | -0.686823000 | -4.114317000 | -0.000068000 | H                               | -5.183107000 | 1.382524000  | 0.000011000  |
| C                         | -1.120957000 | -2.763195000 | 0.000021000  | H                               | -3.198139000 | -3.139350000 | 0.000003000  |
| N                         | 0.000371000  | -1.978705000 | 0.000158000  | H                               | -3.183325000 | 3.272006000  | 0.000057000  |
| C                         | 1.121925000  | -2.762874000 | 0.000017000  | <b><u>[PzP-22,23,24-H]±</u></b> |              |              |              |
| C                         | 4.338454000  | 0.710174000  | -0.000076000 | C                               | -0.679901000 | 4.093310000  | -0.435913000 |
| C                         | 4.341931000  | -0.641291000 | 0.000055000  | C                               | 0.679931000  | 4.093163000  | -0.436288000 |
| C                         | 2.937707000  | -1.043917000 | 0.000015000  | C                               | 1.138830000  | 2.771494000  | -0.124517000 |
| N                         | 2.123041000  | 0.052399000  | 0.000016000  | N                               | -0.000013000 | 1.973090000  | 0.015582000  |
| C                         | 2.930857000  | 1.113495000  | -0.000019000 | C                               | -1.138830000 | 2.771641000  | -0.124183000 |
| C                         | 2.467012000  | -2.337947000 | 0.000016000  | C                               | -4.293644000 | -0.733411000 | 0.382229000  |
| N                         | -0.643314000 | 4.055865000  | 0.000039000  | C                               | -4.277833000 | 0.639458000  | 0.410495000  |
| N                         | 0.641946000  | 4.056035000  | 0.000038000  | C                               | -2.945398000 | 1.069836000  | 0.146139000  |
| C                         | 1.134449000  | 2.758785000  | -0.000017000 | N                               | -2.182714000 | -0.055282000 | 0.010644000  |
| C                         | -0.000358000 | 1.808864000  | -0.000103000 | C                               | -2.970156000 | -1.188922000 | 0.120478000  |
| C                         | -1.135426000 | 2.758470000  | -0.000010000 | C                               | -2.455745000 | 2.377941000  | 0.003614000  |
| C                         | 2.463845000  | 2.460887000  | -0.000008000 | N                               | 0.630634000  | -4.021637000 | -0.534881000 |
| C                         | -4.341682000 | -0.642670000 | -0.000013000 | N                               | -0.630686000 | -4.021641000 | -0.534803000 |
| C                         | -4.338700000 | 0.708794000  | -0.000001000 | C                               | -1.102484000 | -2.755710000 | -0.087422000 |
| C                         | -2.931250000 | 1.112617000  | -0.000025000 | C                               | 0.000029000  | -1.956703000 | 0.215743000  |

|                                |              |              |              |                                |              |              |              |
|--------------------------------|--------------|--------------|--------------|--------------------------------|--------------|--------------|--------------|
| C                              | 1.102382000  | -2.755733000 | -0.087420000 | C                              | -2.949111000 | -1.183308000 | 0.110104000  |
| C                              | -2.468202000 | -2.477522000 | -0.020723000 | C                              | -2.448825000 | 2.379229000  | -0.045944000 |
| C                              | 4.277878000  | 0.639371000  | 0.410629000  | N                              | 0.634530000  | -3.900977000 | -0.442136000 |
| C                              | 4.293612000  | -0.733406000 | 0.382523000  | N                              | -0.676254000 | -3.956061000 | -0.457931000 |
| C                              | 2.970038000  | -1.188944000 | 0.120597000  | C                              | -1.085076000 | -2.784941000 | 0.060381000  |
| N                              | 2.182806000  | -0.055260000 | 0.010352000  | C                              | 0.022489000  | -1.993684000 | 0.432196000  |
| C                              | 2.945413000  | 1.069812000  | 0.145967000  | C                              | 1.135875000  | -2.729377000 | 0.065082000  |
| C                              | 2.455849000  | 2.377813000  | 0.003104000  | C                              | -2.483632000 | -2.459079000 | 0.083972000  |
| C                              | 2.468198000  | -2.477477000 | -0.020564000 | C                              | 4.302684000  | 0.727400000  | 0.122355000  |
| H                              | -1.337210000 | 4.921135000  | -0.655917000 | C                              | 4.333974000  | -0.623804000 | 0.158630000  |
| H                              | 1.337309000  | 4.920868000  | -0.656542000 | C                              | 2.967916000  | -1.115538000 | 0.103998000  |
| H                              | -0.000042000 | 1.215150000  | 0.688640000  | N                              | 2.164470000  | 0.014829000  | 0.044559000  |
| H                              | -5.138090000 | -1.382332000 | 0.559197000  | C                              | 2.914045000  | 1.139573000  | 0.036766000  |
| H                              | -5.107852000 | 1.301425000  | 0.604107000  | C                              | 2.400594000  | 2.426635000  | -0.045795000 |
| H                              | -1.312200000 | -0.067817000 | -0.503079000 | C                              | 2.531923000  | -2.401970000 | 0.088148000  |
| H                              | -3.195069000 | 3.168882000  | -0.025613000 | H                              | -1.404533000 | 4.995632000  | -0.207382000 |
| H                              | 0.000078000  | -1.043294000 | 0.782576000  | H                              | 1.292539000  | 5.019695000  | -0.205530000 |
| H                              | -3.166384000 | -3.302549000 | -0.111805000 | H                              | -5.174110000 | -1.380853000 | 0.204121000  |
| H                              | 5.107734000  | 1.301443000  | 0.604571000  | H                              | -5.164930000 | 1.300242000  | 0.129091000  |
| H                              | 5.137822000  | -1.382505000 | 0.559982000  | H                              | -1.167667000 | 0.037658000  | -0.084135000 |
| H                              | 1.312402000  | -0.067727000 | -0.503574000 | H                              | -3.186998000 | 3.170570000  | -0.070738000 |
| H                              | 3.195071000  | 3.168833000  | -0.026332000 | H                              | 1.160353000  | -4.671982000 | -0.834061000 |
| H                              | 3.166439000  | -3.302478000 | -0.111407000 | H                              | 0.019191000  | -1.097479000 | 1.030299000  |
| <b><u>[PzP-2,22,24-H]⁺</u></b> |              |              |              | H                              | -3.197897000 | -3.272173000 | 0.028103000  |
| C                              | -0.716880000 | 4.163871000  | -0.167397000 | H                              | 5.137184000  | 1.411241000  | 0.146337000  |
| C                              | 0.620019000  | 4.175588000  | -0.166426000 | H                              | 5.200890000  | -1.263823000 | 0.226638000  |
| C                              | 1.045347000  | 2.764613000  | -0.092914000 | H                              | 1.166392000  | 0.057294000  | -0.115620000 |
| N                              | -0.019356000 | 1.928244000  | -0.058135000 | H                              | 3.116577000  | 3.237964000  | -0.064047000 |
| C                              | -1.116738000 | 2.746864000  | -0.093264000 | H                              | 3.271301000  | -3.193687000 | 0.062592000  |
| C                              | -4.320127000 | -0.722424000 | 0.148238000  | <b><u>[PzP-2,22,23-H]⁺</u></b> |              |              |              |
| C                              | -4.316855000 | 0.633348000  | 0.114331000  | C                              | -0.179630000 | 4.195796000  | -0.225642000 |
| C                              | -2.940980000 | 1.067553000  | 0.041907000  | C                              | -1.510228000 | 3.982176000  | -0.177825000 |
| N                              | -2.167409000 | -0.030832000 | 0.060519000  | C                              | -1.733037000 | 2.554328000  | -0.057532000 |



|   |              |              |              |
|---|--------------|--------------|--------------|
| H | 0.249790000  | -1.031273000 | -0.902486000 |
| H | -2.478303000 | -3.771762000 | 0.029506000  |
| H | 4.686561000  | 2.386622000  | -0.335775000 |
| H | 5.348791000  | -0.200995000 | -0.441387000 |
| H | 1.262616000  | 0.096839000  | 0.510461000  |
| H | 2.409608000  | 3.724240000  | 0.113515000  |
| H | 3.869984000  | -2.547436000 | -0.129470000 |

**[PzP-21,22,24-H]±**

|   |              |              |              |
|---|--------------|--------------|--------------|
| C | 0.672467000  | 4.142576000  | -0.000339000 |
| C | -0.674279000 | 4.142388000  | -0.000311000 |
| C | -1.081061000 | 2.742702000  | -0.000051000 |
| N | -0.000452000 | 1.911203000  | 0.000130000  |
| C | 1.079663000  | 2.742958000  | -0.000126000 |
| C | 4.321757000  | -0.705974000 | 0.000414000  |
| C | 4.330034000  | 0.660700000  | 0.000368000  |
| C | 2.966494000  | 1.101074000  | 0.000044000  |
| N | 2.187757000  | -0.018170000 | -0.000113000 |
| C | 2.956414000  | -1.147789000 | 0.000131000  |
| C | 2.435600000  | 2.383437000  | -0.000150000 |
| N | -0.650474000 | -4.052890000 | -0.000387000 |
| N | 0.652345000  | -4.052804000 | -0.000337000 |
| C | 1.138404000  | -2.780415000 | -0.000049000 |
| C | 0.000595000  | -1.823411000 | 0.000189000  |
| C | -1.136971000 | -2.780569000 | -0.000121000 |
| C | 2.479141000  | -2.467792000 | -0.000003000 |
| C | -4.330290000 | 0.658760000  | 0.000343000  |
| C | -4.321505000 | -0.707866000 | 0.000327000  |
| C | -2.956052000 | -1.149054000 | 0.000054000  |
| N | -2.187984000 | -0.019064000 | -0.000074000 |
| C | -2.967022000 | 1.099798000  | 0.000131000  |
| C | -2.436682000 | 2.382536000  | 0.000096000  |
| C | -2.477911000 | -2.468777000 | -0.000132000 |
| H | 1.347836000  | 4.985217000  | -0.000518000 |

|   |              |              |              |
|---|--------------|--------------|--------------|
| H | -1.349898000 | 4.984816000  | -0.000448000 |
| H | 5.171691000  | -1.371207000 | 0.000607000  |
| H | 5.188021000  | 1.315332000  | 0.000523000  |
| H | 1.183901000  | 0.086393000  | -0.000386000 |
| H | 3.149732000  | 3.199034000  | -0.000309000 |
| H | 0.000623000  | -1.199015000 | -0.901964000 |
| H | 0.000555000  | -1.199563000 | 0.902717000  |
| H | 3.201046000  | -3.276054000 | -0.000185000 |
| H | -5.188668000 | 1.312886000  | 0.000509000  |
| H | -5.171329000 | -1.373237000 | 0.000460000  |
| H | -1.184162000 | 0.085775000  | -0.000315000 |
| H | -3.151344000 | 3.197678000  | 0.000248000  |
| H | -3.199120000 | -3.277661000 | -0.000364000 |

**[PzP-21,22,23-H]±**

|   |              |              |              |
|---|--------------|--------------|--------------|
| C | -0.232780000 | 4.164812000  | 0.123050000  |
| C | 1.130027000  | 4.046472000  | 0.160371000  |
| C | 1.445840000  | 2.661763000  | 0.069813000  |
| N | 0.268815000  | 1.972766000  | 0.005941000  |
| C | -0.795008000 | 2.856598000  | 0.022239000  |
| C | -4.347801000 | -0.290268000 | -0.256639000 |
| C | -4.185173000 | 1.072696000  | -0.320998000 |
| C | -2.819122000 | 1.367254000  | -0.043339000 |
| N | -2.198192000 | 0.160793000  | 0.181522000  |
| C | -3.089303000 | -0.871361000 | 0.065838000  |
| C | -2.163038000 | 2.591382000  | -0.048537000 |
| N | 0.221450000  | -4.097531000 | 0.028819000  |
| N | -1.055299000 | -3.975045000 | 0.135459000  |
| C | -1.422408000 | -2.644047000 | 0.177389000  |
| C | -0.195911000 | -1.804019000 | 0.112827000  |
| C | 0.835214000  | -2.861762000 | -0.004723000 |
| C | -2.727783000 | -2.235962000 | 0.154864000  |
| C | 4.387144000  | 0.184923000  | -0.100231000 |
| C | 4.227214000  | -1.150539000 | -0.148872000 |



|   |              |              |              |
|---|--------------|--------------|--------------|
| C | 2.778536000  | -1.390332000 | -0.117795000 |
| N | 2.092659000  | -0.242947000 | -0.067294000 |
| C | 3.035788000  | 0.749520000  | -0.048392000 |
| C | 2.735121000  | 2.092501000  | 0.025738000  |
| C | 2.184519000  | -2.683056000 | -0.108414000 |
| H | -0.818206000 | 5.070441000  | 0.173851000  |
| H | 1.860766000  | 4.836358000  | 0.240871000  |
| H | 0.290725000  | 0.977063000  | -0.193728000 |
| H | -5.248056000 | -0.853516000 | -0.448496000 |
| H | -4.930413000 | 1.809695000  | -0.579381000 |
| H | -1.326019000 | 0.085262000  | 0.677654000  |
| H | -2.795136000 | 3.468294000  | -0.133148000 |
| H | 0.002848000  | -1.213337000 | 1.014454000  |
| H | -0.186223000 | -1.135418000 | -0.752195000 |
| H | -3.511175000 | -2.984201000 | 0.127181000  |
| H | 5.304154000  | 0.755237000  | -0.097767000 |
| H | 4.984579000  | -1.919169000 | -0.192951000 |
| H | 3.558943000  | 2.796476000  | 0.056252000  |
| H | 2.820712000  | -3.558894000 | -0.168865000 |

**[PzP-2,21,22-H]+**

|   |              |              |              |
|---|--------------|--------------|--------------|
| C | 1.786571000  | 3.886872000  | -0.000050000 |
| C | 0.477981000  | 4.175641000  | -0.000035000 |
| C | -0.235922000 | 2.880817000  | -0.000006000 |
| N | 0.629435000  | 1.850357000  | -0.000013000 |
| C | 1.866573000  | 2.418610000  | -0.000031000 |
| C | 3.950195000  | -1.797011000 | 0.000079000  |
| C | 4.346559000  | -0.499199000 | 0.000070000  |
| C | 3.158853000  | 0.317156000  | 0.000003000  |
| N | 2.088643000  | -0.511983000 | -0.000040000 |
| C | 2.504551000  | -1.830559000 | 0.000012000  |
| C | 3.062123000  | 1.711919000  | -0.000024000 |
| N | -1.697059000 | -3.656032000 | -0.000059000 |
| C | 0.307244000  | -2.933008000 | -0.000006000 |

|   |              |              |              |
|---|--------------|--------------|--------------|
| C | -0.560785000 | -1.716454000 | 0.000041000  |
| C | -1.921234000 | -2.324772000 | -0.000014000 |
| C | 1.716935000  | -2.955878000 | -0.000011000 |
| C | -3.965033000 | 1.825946000  | 0.000051000  |
| C | -4.405468000 | 0.558488000  | 0.000043000  |
| C | -3.190123000 | -0.282924000 | 0.000021000  |
| N | -2.075730000 | 0.465167000  | 0.000001000  |
| C | -2.484690000 | 1.745890000  | 0.000022000  |
| C | -1.641215000 | 2.849164000  | 0.000016000  |
| C | -3.145651000 | -1.684310000 | -0.000015000 |
| H | 2.632244000  | 4.558299000  | -0.000067000 |
| H | -0.000227000 | 5.144169000  | -0.000039000 |
| H | 4.570939000  | -2.680323000 | 0.000124000  |
| H | 5.353719000  | -0.111775000 | 0.000109000  |
| H | 1.152656000  | -0.102231000 | -0.000103000 |
| H | 3.990101000  | 2.270278000  | -0.000026000 |
| H | -0.427942000 | -1.065484000 | -0.871656000 |
| H | -0.427978000 | -1.065570000 | 0.871807000  |
| H | 2.206964000  | -3.922338000 | -0.000045000 |
| H | -4.542426000 | 2.738876000  | 0.000067000  |
| H | -5.422906000 | 0.196552000  | 0.000050000  |
| H | -2.124694000 | 3.820485000  | 0.000032000  |
| H | -4.065121000 | -2.257300000 | -0.000055000 |
| N | -0.410801000 | -4.035713000 | -0.000044000 |
| H | -2.401517000 | -4.384530000 | -0.000096000 |

**[PzP-2,21,23-H]+**

|   |              |              |              |
|---|--------------|--------------|--------------|
| C | -0.636962000 | 4.162679000  | 0.000462000  |
| C | 0.716271000  | 4.150057000  | 0.000435000  |
| C | 1.146598000  | 2.770284000  | 0.000020000  |
| N | 0.030163000  | 1.996725000  | -0.000325000 |
| C | -1.097922000 | 2.791524000  | 0.000001000  |
| C | -4.368642000 | -0.638648000 | -0.000362000 |
| C | -4.327603000 | 0.705697000  | -0.000250000 |



|   |              |              |              |
|---|--------------|--------------|--------------|
| H | -4.620267000 | -2.579189000 | 0.000099000  |
| H | -3.947221000 | 2.351312000  | -0.000046000 |
| H | -2.307610000 | -3.864176000 | -0.000022000 |

**[PzP-2,22,23,24-H]2+**

|   |              |              |              |
|---|--------------|--------------|--------------|
| C | -0.700191000 | 4.109699000  | -0.495087000 |
| C | 0.650709000  | 4.117442000  | -0.495895000 |
| C | 1.119799000  | 2.794326000  | -0.147462000 |
| N | -0.009737000 | 1.986521000  | 0.012716000  |
| C | -1.156165000 | 2.780268000  | -0.148170000 |
| C | -4.301730000 | -0.719297000 | 0.435336000  |
| C | -4.276444000 | 0.645496000  | 0.455429000  |
| C | -2.938275000 | 1.062857000  | 0.161393000  |
| N | -2.176980000 | -0.046095000 | 0.027314000  |
| C | -2.972956000 | -1.191760000 | 0.155468000  |
| C | -2.460266000 | 2.387762000  | -0.019602000 |
| N | 0.609742000  | -3.887834000 | -0.617068000 |
| N | -0.691933000 | -3.931522000 | -0.629410000 |
| C | -1.100623000 | -2.763684000 | -0.089839000 |
| C | 0.013500000  | -1.983629000 | 0.280786000  |
| C | 1.124165000  | -2.726365000 | -0.087857000 |
| C | -2.499108000 | -2.464019000 | 0.030034000  |
| C | 4.267855000  | 0.694893000  | 0.457988000  |
| C | 4.306416000  | -0.664938000 | 0.438497000  |
| C | 2.978533000  | -1.152857000 | 0.152227000  |
| N | 2.172891000  | -0.016196000 | 0.021423000  |
| C | 2.920901000  | 1.104353000  | 0.161598000  |
| C | 2.434437000  | 2.417622000  | -0.008514000 |
| C | 2.521758000  | -2.430077000 | 0.034922000  |
| H | -1.364351000 | 4.926784000  | -0.737885000 |
| H | 1.305780000  | 4.941935000  | -0.737599000 |
| H | -0.003680000 | 1.277694000  | 0.739044000  |
| H | -5.147889000 | -1.362995000 | 0.629591000  |
| H | -5.097791000 | 1.317283000  | 0.654828000  |

|   |              |              |              |
|---|--------------|--------------|--------------|
| H | -1.308824000 | -0.052419000 | -0.491925000 |
| H | -3.211826000 | 3.165645000  | -0.080368000 |
| H | 1.126378000  | -4.667749000 | -1.013554000 |
| H | 0.017254000  | -1.110549000 | 0.909718000  |
| H | -3.203384000 | -3.289345000 | 0.010149000  |
| H | 5.081562000  | 1.375277000  | 0.660183000  |
| H | 5.157876000  | -1.300358000 | 0.636519000  |
| H | 1.306447000  | -0.032072000 | -0.500689000 |
| H | 3.175127000  | 3.206573000  | -0.053140000 |
| H | 3.245549000  | -3.238363000 | 0.042803000  |

**[PzP-2,21,22,24-H]2+**

|   |              |              |              |
|---|--------------|--------------|--------------|
| C | 0.793446000  | 4.167018000  | 0.000141000  |
| C | -0.545817000 | 4.195971000  | 0.000147000  |
| C | -0.984130000 | 2.792575000  | 0.000047000  |
| N | 0.049703000  | 1.936675000  | -0.000059000 |
| C | 1.173198000  | 2.747937000  | 0.000020000  |
| C | 4.318969000  | -0.787540000 | -0.000149000 |
| C | 4.350729000  | 0.571700000  | -0.000157000 |
| C | 2.987286000  | 1.033083000  | -0.000054000 |
| N | 2.182992000  | -0.043970000 | 0.000047000  |
| C | 2.935053000  | -1.212126000 | -0.000012000 |
| C | 2.496301000  | 2.356921000  | -0.000048000 |
| N | -0.720961000 | -3.974665000 | 0.000118000  |
| N | 0.621342000  | -4.041964000 | 0.000142000  |
| C | 1.071162000  | -2.813042000 | 0.000053000  |
| C | -0.059122000 | -1.830662000 | -0.000054000 |
| C | -1.245332000 | -2.734108000 | 0.000020000  |
| C | 2.453121000  | -2.495555000 | 0.000061000  |
| C | -4.315754000 | 0.811721000  | -0.000157000 |
| C | -4.348707000 | -0.542003000 | -0.000172000 |
| C | -2.980899000 | -1.031061000 | -0.000054000 |
| N | -2.176635000 | 0.066634000  | 0.000041000  |
| C | -2.924339000 | 1.218537000  | -0.000022000 |

|   |              |              |              |
|---|--------------|--------------|--------------|
| C | -2.372989000 | 2.472236000  | 0.000057000  |
| C | -2.578377000 | -2.369242000 | -0.000007000 |
| H | 1.490604000  | 4.992256000  | 0.000205000  |
| H | -1.205739000 | 5.051226000  | 0.000227000  |
| H | 5.157993000  | -1.468446000 | -0.000216000 |
| H | 5.218040000  | 1.214734000  | -0.000240000 |
| H | 1.182365000  | 0.095638000  | 0.000174000  |
| H | 3.242775000  | 3.142883000  | -0.000128000 |
| H | -1.233655000 | -4.852972000 | 0.000186000  |
| H | -0.048097000 | -1.205907000 | -0.903006000 |
| H | -0.048119000 | -1.205733000 | 0.902781000  |
| H | 3.160259000  | -3.318096000 | 0.000152000  |
| H | -5.152680000 | 1.494612000  | -0.000223000 |
| H | -5.217251000 | -1.183954000 | -0.000252000 |
| H | -1.170727000 | 0.147582000  | 0.000171000  |
| H | -3.060958000 | 3.309953000  | 0.000133000  |
| H | -3.352677000 | -3.126918000 | 0.000048000  |

**[PzP-2,21,23,24-H]2+**

|   |              |              |              |
|---|--------------|--------------|--------------|
| C | 1.002109000  | 4.118493000  | 0.204809000  |
| C | -0.354383000 | 4.199951000  | 0.163258000  |
| C | -0.874952000 | 2.867948000  | 0.018124000  |
| N | 0.182891000  | 2.013743000  | -0.011387000 |
| C | 1.366458000  | 2.730640000  | 0.080795000  |
| C | 4.288974000  | -0.996387000 | -0.182276000 |
| C | 4.372634000  | 0.344274000  | -0.124287000 |
| C | 2.988615000  | 0.827966000  | -0.052837000 |
| N | 2.101039000  | -0.159278000 | -0.065762000 |
| C | 2.859121000  | -1.319047000 | -0.131808000 |
| C | 2.633431000  | 2.207244000  | 0.042522000  |
| N | -0.894426000 | -3.923860000 | 0.149898000  |
| N | 0.447127000  | -4.055084000 | 0.037838000  |
| C | 0.942482000  | -2.845481000 | 0.003866000  |
| C | -0.134353000 | -1.817725000 | 0.117378000  |

|   |              |              |              |
|---|--------------|--------------|--------------|
| C | -1.356252000 | -2.670164000 | 0.183986000  |
| C | 2.336633000  | -2.586738000 | -0.105984000 |
| C | -4.217950000 | 0.973087000  | -0.342565000 |
| C | -4.341441000 | -0.373563000 | -0.253214000 |
| C | -3.043641000 | -0.929106000 | 0.068634000  |
| N | -2.170256000 | 0.133186000  | 0.158543000  |
| C | -2.837808000 | 1.320457000  | -0.076527000 |
| C | -2.252510000 | 2.560778000  | -0.086244000 |
| C | -2.691896000 | -2.265978000 | 0.166257000  |
| H | 1.711011000  | 4.926158000  | 0.316883000  |
| H | -0.968756000 | 5.085060000  | 0.235309000  |
| H | 0.210577000  | 1.031037000  | -0.261355000 |
| H | 5.088178000  | -1.720854000 | -0.240768000 |
| H | 5.256156000  | 0.965778000  | -0.128129000 |
| H | 3.446820000  | 2.923586000  | 0.096856000  |
| H | -1.445064000 | -4.779004000 | 0.172316000  |
| H | -0.152388000 | -1.145804000 | -0.745168000 |
| H | 0.032944000  | -1.220326000 | 1.020539000  |
| H | 2.998635000  | -3.444880000 | -0.155806000 |
| H | -4.982938000 | 1.688225000  | -0.608653000 |
| H | -5.226800000 | -0.967088000 | -0.429052000 |
| H | -1.347864000 | 0.109550000  | 0.742018000  |
| H | -2.913497000 | 3.413005000  | -0.193223000 |
| H | -3.483264000 | -3.005289000 | 0.130998000  |

**[PzP-2,21,22,23-H]2+**

|   |              |              |              |
|---|--------------|--------------|--------------|
| C | 0.463824000  | 4.192449000  | 0.142056000  |
| C | -0.888015000 | 4.144309000  | 0.172772000  |
| C | -1.285568000 | 2.758246000  | 0.067075000  |
| N | -0.134366000 | 2.009893000  | 0.003786000  |
| C | 0.964838000  | 2.837928000  | 0.027519000  |
| C | 4.336796000  | -0.490954000 | -0.250110000 |
| C | 4.237886000  | 0.863410000  | -0.344725000 |
| C | 2.875767000  | 1.228732000  | -0.065025000 |

|   |              |              |              |
|---|--------------|--------------|--------------|
| N | 2.182705000  | 0.078623000  | 0.168918000  |
| C | 3.035303000  | -1.020712000 | 0.075138000  |
| C | 2.309553000  | 2.507761000  | -0.046815000 |
| N | -0.429561000 | -3.995798000 | 0.039342000  |
| N | 0.911324000  | -3.982016000 | 0.131934000  |
| C | 1.276022000  | -2.721665000 | 0.180186000  |
| C | 0.082376000  | -1.817836000 | 0.120446000  |
| C | -1.027832000 | -2.797721000 | 0.006925000  |
| C | 2.638848000  | -2.331812000 | 0.149971000  |
| C | -4.359844000 | 0.461154000  | -0.116131000 |
| C | -4.305831000 | -0.876696000 | -0.161901000 |
| C | -2.872622000 | -1.227742000 | -0.115400000 |
| N | -2.093506000 | -0.106655000 | -0.063879000 |
| C | -2.956593000 | 0.920215000  | -0.055083000 |
| C | -2.579512000 | 2.273782000  | 0.021019000  |
| C | -2.391231000 | -2.531408000 | -0.093225000 |
| H | 1.099351000  | 5.063664000  | 0.204725000  |
| H | -1.580439000 | 4.968552000  | 0.261860000  |
| H | -0.192137000 | 1.025796000  | -0.234155000 |
| H | 5.209881000  | -1.100772000 | -0.433631000 |
| H | 5.014655000  | 1.563510000  | -0.614724000 |
| H | 1.355006000  | 0.079190000  | 0.745474000  |
| H | 2.998750000  | 3.341217000  | -0.114632000 |
| H | -0.884002000 | -4.904951000 | -0.015702000 |
| H | 0.102982000  | -1.149227000 | -0.745355000 |
| H | -0.079960000 | -1.210492000 | 1.018133000  |
| H | 3.389457000  | -3.113018000 | 0.100451000  |
| H | -5.227881000 | 1.104288000  | -0.121942000 |
| H | -5.119150000 | -1.586062000 | -0.210524000 |
| H | -3.370565000 | 3.014160000  | 0.054234000  |
| H | -3.097097000 | -3.352839000 | -0.143067000 |
